# Supplementary material for: The effect of legacy gold mining on methylmercury cycling and microbial community structure in northern freshwater lakes
Source: Royal Society of Chemistry journal article supplement (doi:10.1039/d1em00129a), 2021-01-01
Supplement: d1em00129a2.csv [file d1em00129a2.csv]

Lake Name	Treatment	Time (hour)	202_Hg (ug/kg)	199_Hg (ug/Kg)	198_Hg (ug/kg)	Replicate
BC17	spiked	0	3.0717	0.2074	24.9149	1
BC17	spiked	6	6.3792	21.7901	39.7944	1
BC17	spiked	12	6.0907	26.364	38.1802	1
BC17	spiked	24	8.5983	38.7424	48.4085	1
BC17	spiked	48	10.6998	39.6034	42.2161	1
BC17	spiked	0	3.6246	0.3069	29.9407	2
BC17	spiked	6	3.7897	13.2288	27.2396	2
BC17	spiked	12	4.5107	19.6373	30.269	2
BC17	spiked	24	6.254	27.1395	37.2342	2
BC17	spiked	48	7.4011	33.114	38.82	2
BC17	spiked	0	3.5228	0.3159	30.1425	3
BC17	spiked	6	5.0985	17.8619	33.9861	3
BC17	spiked	12	5.062	20.5241	32.0964	3
BC17	spiked	24	11.9725	49.4971	60.9777	3
BC17	spiked	48	9.1764	39.014	43.2173	3
BC17	unspiked	0	3.4314	0.132	0.1015	1
BC17	unspiked	6	4.2659	0.0384	0.0724	1
BC17	unspiked	12	4.4374	0.0088	-0.0136	1
BC17	unspiked	24	4.5721	-0.0404	0.0003	1
BC17	unspiked	48	4.7669	0.1798	0.0856	1
BC17	unspiked	0	3.2875	-0.0595	-0.0536	2
BC17	unspiked	6	4.4301	0.0676	0.0746	2
BC17	unspiked	12	3.2009	0.0075	-0.0054	2
BC17	unspiked	24	3.7116	0.0495	-0.0302	2
BC17	unspiked	48	3.6798	0.0281	0.0327	2
BC17	unspiked	0	4.2669	0.0283	0.0742	3
BC17	unspiked	6	3.8993	-0.0898	0.0117	3
BC17	unspiked	12	4.3654	0.0874	-0.0145	3
BC17	unspiked	24	4.4456	0.0463	0.1031	3
BC17	unspiked	48	4.544	-0.0903	0.0706	3
BC18	spiked	0	3.812	1.2872	147.8713	1
BC18	spiked	6	6.0025	8.2224	179.4489	1
BC18	spiked	12	2.7248	7.869	129.7219	1
BC18	spiked	24	4.6234	17.941	139.3452	1
BC18	spiked	48	6.8828	48.2847	135.3772	1
BC18	spiked	0	2.4684	0.7751	106.1976	2
BC18	spiked	6	2.2877	4.8024	111.8177	2
BC18	spiked	12	2.8853	6.6555	119.2556	2
BC18	spiked	24	2.8751	12.8144	111.3671	2
BC18	spiked	48	6.2533	39.1658	127.3155	2
BC18	spiked	0	2.2447	1.0545	125.6992	3
BC18	spiked	6	2.6981	6.4913	124.5676	3
BC18	spiked	12	2.822	7.3232	115.9701	3
BC18	spiked	24	3.5605	16.7866	118.8209	3
BC18	spiked	48	5.6932	37.5433	122.9637	3
BC18	unspiked	0	2.8009	-0.0616	0.0204	1
BC18	unspiked	6	4.348	0.0081	0.1317	1
BC18	unspiked	12	2.7425	0.0222	0.0066	1
BC18	unspiked	24	2.3074	0.2273	0.2715	1
BC18	unspiked	48	3.4622	0.2288	0.3704	1
BC18	unspiked	0	2.2391	0.0154	0.0599	2
BC18	unspiked	6	2.1343	0.0291	0.0621	2
BC18	unspiked	12	2.1767	-0.0029	0.0385	2
BC18	unspiked	24	2.1511	0.0115	0.0308	2
BC18	unspiked	48	2.4372	0.008	-0.0269	2
BC18	unspiked	0	2.0006	0.0122	0.0662	3
BC18	unspiked	6	2.2517	-0.0491	0.0404	3
BC18	unspiked	12	2.273	-0.0417	0.0635	3
BC18	unspiked	24	1.904	0.0631	0.0108	3
BC18	unspiked	48	2.5019	-0.0201	0.0081	3
BC20	spiked	0	2.3595	0.0888	26.3018	1
BC20	spiked	6	2.8552	9.0143	23.3248	1
BC20	spiked	12	3.5195	12.7289	21.8393	1
BC20	spiked	24	4.0922	15.5297	20.8155	1
BC20	spiked	48	4.5987	17.9541	20.5951	1
BC20	spiked	0	1.4695	0.2975	9.2195	2
BC20	spiked	6	3.001	9.8054	25.4171	2
BC20	spiked	12	4.4031	15.986	25.1113	2
BC20	spiked	24	4.3107	16.572	21.7086	2
BC20	spiked	48	5.1803	21.9645	23.4439	2
BC20	spiked	0	2.4531	0.0895	23.8477	3
BC20	spiked	6	4.0582	11.1299	27.1247	3
BC20	spiked	12	3.3969	11.2149	18.3347	3
BC20	spiked	24	4.2083	16.5614	20.4216	3
BC20	spiked	48	4.4624	18.0957	19.8007	3
BC20	unspiked	0	2.2322	0.0021	0.0139	1
BC20	unspiked	6	2.5018	0.0198	-0.0089	1
BC20	unspiked	12	2.5906	0.0184	0.0126	1
BC20	unspiked	24	2.9891	-0.0094	-0.0186	1
BC20	unspiked	48	2.8149	0.0209	0.0015	1
BC20	unspiked	0	3.6263	-0.0799	-0.0455	2
BC20	unspiked	6	3.7894	-0.2054	-0.005	2
BC20	unspiked	12	3.5539	-0.0924	0.0035	2
BC20	unspiked	24	3.3987	0.0116	0.0037	2
BC20	unspiked	48	3.7936	-0.0302	-0.0012	2
BC20	unspiked	0	2.3065	0.0195	0.0233	3
BC20	unspiked	6	2.7812	-0.0199	0.0154	3
BC20	unspiked	12	2.8016	0.0056	0.0094	3
BC20	unspiked	24	3.1434	-0.0662	0.0094	3
BC20	unspiked	48	2.7027	0.0281	0.0033	3
BC21	spiked	0	2.4578	0.1394	62.8655	1
BC21	spiked	6	1.7561	3.2594	55.0451	1
BC21	spiked	12	1.5265	4.4021	50.171	1
BC21	spiked	24	2.4838	7.7204	51.6253	1
BC21	spiked	48	4.7501	23.0345	63.3129	1
BC21	spiked	0	1.7442	0.1901	60.7771	2
BC21	spiked	6	2.0486	4.5812	55.4915	2
BC21	spiked	12	2.4124	6.789	55.7148	2
BC21	spiked	24	2.5622	11.9902	57.3169	2
BC21	spiked	48	5.3597	29.9785	67.5363	2
BC21	spiked	0	1.6331	0.1118	58.4466	3
BC21	spiked	6	1.2959	3.068	37.0529	3
BC21	spiked	12	2.7005	4.7564	55.4127	3
BC21	spiked	24	3.2525	10.0062	58.8641	3
BC21	spiked	48	6.6549	29.9539	70.813	3
BC21	unspiked	0	1.5716	0.0186	0.0597	1
BC21	unspiked	6	1.8245	0.0569	0.0304	1
BC21	unspiked	12	1.9965	0.0185	0.059	1
BC21	unspiked	24	2.5371	0.0109	0.0293	1
BC21	unspiked	48	3.4232	0.0473	0.0624	1
BC21	unspiked	0	1.8043	0.1292	0.064	2
BC21	unspiked	6	2.0012	-0.0022	0.0215	2
BC21	unspiked	12	2.7775	0.0197	0.1072	2
BC21	unspiked	24	3.6967	0.0208	0.0085	2
BC21	unspiked	48	5.1412	0.0241	-0.0425	2
BC21	unspiked	0	2.0721	0.0662	0.1074	3
BC21	unspiked	6	1.8067	0.0063	0.0396	3
BC21	unspiked	12	2.2585	0.0374	0.0484	3
BC21	unspiked	24	2.1759	-0.0293	0.0404	3
BC21	unspiked	48	2.8987	-0.022	0.0331	3
BC24	spiked	0	2.531	-0.2622	25.2629	1
BC24	spiked	6	3.0901	1.5099	30.469	1
BC24	spiked	12	1.9523	2.0846	34.5865	1
BC24	spiked	24	30.1573	4.0484	21.5299	1
BC24	spiked	48	8.4741	-0.3626	35.0236	1
BC24	spiked	0	1.5162	0.1426	21.4056	2
BC24	spiked	6	1.023	0.8457	22.2524	2
BC24	spiked	12	1.2805	1.4234	23.0273	2
BC24	spiked	24	1.8247	4.4385	23.1556	2
BC24	spiked	48	3.9255	15.2746	20.5835	2
BC24	unspiked	0	4.3245	-0.3409	-0.2652	1
BC24	unspiked	6	2.5569	0.1533	-0.0175	1
BC24	unspiked	12	4.5125	0.074	0.0301	1
BC24	unspiked	24	3.4768	5.2535	1.8501	1
BC24	unspiked	48	9.7462	24.8651	1.072	1
BC24	unspiked	0	1.4281	-0.0136	0.0192	2
BC24	unspiked	6	1.3053	0.0352	0.0209	2
BC24	unspiked	12	1.4984	0.0573	0.1648	2
BC24	unspiked	24	2.9967	0.0676	0.1527	2
BC24	unspiked	48	3.5457	0.017	0.0553	2
BC30	spiked	0	1.5027	0.0826	37.061	1
BC30	spiked	6	1.8896	2.7843	34.5447	1
BC30	spiked	12	2.2983	6.0966	36.2361	1
BC30	spiked	24	3.0435	10.5291	34.6018	1
BC30	spiked	48	6.0327	25.1417	45.8037	1
BC30	spiked	0	1.305	0.1003	38.2806	2
BC30	spiked	6	1.5927	2.7785	35.7794	2
BC30	spiked	12	2.092	5.8225	34.7516	2
BC30	spiked	24	3.055	11.0889	35.1807	2
BC30	spiked	48	4.8094	21.2809	35.8524	2
BC30	spiked	0	1.4458	0.1459	33.4093	3
BC30	spiked	6	1.6682	2.7548	32.59	3
BC30	spiked	12	2.5651	7.2946	39.0248	3
BC30	spiked	24	3.2262	12.3924	35.7648	3
BC30	spiked	48	5.7827	23.8748	38.4573	3
BC30	unspiked	0	1.6185	-0.0377	0.0358	1
BC30	unspiked	6	1.5594	-0.0715	0.0322	1
BC30	unspiked	12	2.1114	-0.003	0.0209	1
BC30	unspiked	24	2.3239	-0.0393	-0.0041	1
BC30	unspiked	48	2.7508	0	0.0123	1
BC30	unspiked	0	1.3641	0.0217	0.0357	2
BC30	unspiked	6	1.5485	0.0006	0.0436	2
BC30	unspiked	12	1.7917	0.0001	0.0112	2
BC30	unspiked	24	1.7514	0.0088	0.0253	2
BC30	unspiked	48	2.3104	0.0036	0.0062	2
BC30	unspiked	0	1.3379	0.0092	0.0839	3
BC30	unspiked	6	1.618	-0.0058	0.0459	3
BC30	unspiked	12	1.7763	0.0238	0.021	3
BC30	unspiked	24	2.2334	-0.0176	-0.0234	3
BC30	unspiked	48	2.1064	0.0482	0.0043	3
BC36	spiked	0	26.0214	0.9374	88.8387	1
BC36	spiked	6	9.5578	12.648	28.5681	1
BC36	spiked	12	21.7187	31.3919	42.7226	1
BC36	spiked	24	18.8925	38.011	32.6563	1
BC36	spiked	48	52.6405	151.9022	93.9749	1
BC36	spiked	0	5.8965	0.169	68.1329	2
BC36	spiked	6	8.97	28.8685	70.6534	2
BC36	spiked	12	12.2796	50.6201	73.1146	2
BC36	spiked	24	18.1025	95.5853	86.7959	2
BC36	spiked	48	22.0511	115.5051	76.3366	2
BC36	unspiked	0	7.4766	-0.2491	2.3886	1
BC36	unspiked	6	5.8629	0.2735	0.0173	1
BC36	unspiked	12	12.0639	-0.5708	2.1255	1
BC36	unspiked	24	7.7471	0.5302	0.0551	1
BC36	unspiked	48	5.7997	0.7122	0.1632	1
BC36	unspiked	0	6.4745	-0.0616	-0.0119	2
BC36	unspiked	6	6.5516	-0.0272	0.0528	2
BC36	unspiked	12	7.2978	0.053	0.0753	2
BC36	unspiked	24	9.0896	0.0911	0.0309	2
BC36	unspiked	48	12.6168	0.0849	-0.0168	2
BC43	spiked	0	1.2176	0.4188	31.3012	1
BC43	spiked	6	1.6789	2.359	28.6387	1
BC43	spiked	12	1.8435	4.8211	32.1466	1
BC43	spiked	24	4.3005	20.5109	38.935	1
BC43	spiked	48	5.7175	34.5564	35.6669	1
BC43	spiked	0	1.3053	0.2292	33.1278	2
BC43	spiked	6	1.5476	2.7778	32.2423	2
BC43	spiked	12	1.5484	3.2181	30.7286	2
BC43	spiked	24	2.886	13.7871	32.4784	2
BC43	spiked	48	6.1734	32.283	38.5375	2
BC43	spiked	0	1.3835	0.2445	28.0159	3
BC43	spiked	6	1.8666	3.7413	30.9913	3
BC43	spiked	12	6.6166	12.0282	33.4511	3
BC43	spiked	24	4.4462	24.2937	35.9565	3
BC43	spiked	48	7.7805	42.7672	39.2306	3
BC43	unspiked	0	1.5846	0.0172	0.0854	1
BC43	unspiked	6	1.5937	0.0999	0.0349	1
BC43	unspiked	12	2.0257	-0.0388	0.0268	1
BC43	unspiked	24	2.9566	-0.0484	-0.0745	1
BC43	unspiked	48	3.515	0.0539	0.0246	1
BC43	unspiked	0	0.8331	0.0443	0.0249	2
BC43	unspiked	6	0.777	0.0132	0.041	2
BC43	unspiked	12	1.1364	-0.0101	0.0081	2
BC43	unspiked	24	1.2626	-0.0328	0.0363	2
BC43	unspiked	48	1.2594	0.055	0.023	2
BC43	unspiked	0	1.3775	0.0589	0.0554	3
BC43	unspiked	6	1.5849	0.0567	-0.0066	3
BC43	unspiked	12	1.8546	0.0236	0.0467	3
BC43	unspiked	24	2.8173	-0.0113	-0.0145	3
BC43	unspiked	48	3.4398	-0.0107	0.0283	3
BCR07	spiked	0	3.9007	0.1352	60.4913	1
BCR07	spiked	6	3.79	13.6428	61.0381	1
BCR07	spiked	12	4.4781	13.411	58.4199	1
BCR07	spiked	24	4.7322	20.2021	53.0756	1
BCR07	spiked	48	15.2037	47.8232	92.5831	1
BCR07	spiked	0	1.9663	0.1737	64.2019	2
BCR07	spiked	6	3.468	10.8551	59.0439	2
BCR07	spiked	12	3.5446	14.6161	55.3835	2
BCR07	spiked	24	4.5969	22.0878	51.2249	2
BCR07	spiked	48	7.5179	35.3719	61.6215	2
BCR07	spiked	0	2.3669	0.3231	60.8403	3
BCR07	spiked	6	3.6754	11.1915	63.1696	3
BCR07	spiked	12	4.1873	17.0107	64.7639	3
BCR07	spiked	24	5.8615	25.9305	69.0502	3
BCR07	spiked	48	6.9756	32.2556	61.0753	3
BCR07	unspiked	0	3.0232	0.0265	0.0954	1
BCR07	unspiked	6	1.7056	0.0984	0.1813	1
BCR07	unspiked	12	2.9037	-0.0668	0.0754	1
BCR07	unspiked	24	3.422	0.0493	0.0135	1
BCR07	unspiked	48	4.975	-0.0323	0.0135	1
BCR07	unspiked	0	1.8308	-0.0027	0.0681	2
BCR07	unspiked	6	2.4762	0.0289	0.1124	2
BCR07	unspiked	12	2.2861	0.0533	0.0414	2
BCR07	unspiked	24	3.604	-0.0059	-0.0113	2
BCR07	unspiked	48	3.4709	0.0137	0.0221	2
BCR07	unspiked	0	2.3932	0.0122	0.0216	3
BCR07	unspiked	6	2.3292	0.0326	0.015	3
BCR07	unspiked	12	3.1766	-0.0544	-0.0007	3
BCR07	unspiked	24	3.8011	0.0105	0.0364	3
BCR07	unspiked	48	3.82	0.0623	0.0438	3
DAVID	spiked	0	2.3255	0.7606	121.6125	1
DAVID	spiked	6	2.8618	7.8334	123.0387	1
DAVID	spiked	12	3.5684	10.3004	134.2383	1
DAVID	spiked	24	4.6468	27.6063	131.6842	1
DAVID	spiked	48	7.2869	46.5075	144.527	1
DAVID	spiked	0	2.6589	0.6884	132.6369	2
DAVID	spiked	6	2.8225	7.1369	115.5881	2
DAVID	spiked	12	4.1752	12.394	132.9034	2
DAVID	spiked	24	4.3664	27.7536	125.323	2
DAVID	spiked	48	6.2312	44.8087	125.5306	2
DAVID	spiked	0	2.7946	0.7523	114.025	3
DAVID	spiked	6	3.4755	11.7105	142.0834	3
DAVID	spiked	12	3.9882	16.4308	144.0287	3
DAVID	spiked	24	5.5763	34.8488	145.9191	3
DAVID	spiked	48	6.8223	49.6522	139.6102	3
DAVID	unspiked	0	2.3954	0.0798	0.142	1
DAVID	unspiked	6	2.4336	-0.0128	0.0387	1
DAVID	unspiked	12	2.7482	0.0298	0.0339	1
DAVID	unspiked	24	3.0602	0.1174	0.2509	1
DAVID	unspiked	48	3.5401	-0.0335	0.0243	1
DAVID	unspiked	0	2.3392	0.0223	0.0886	2
DAVID	unspiked	6	2.1899	0.0362	0.0609	2
DAVID	unspiked	12	2.413	0.0185	0.0644	2
DAVID	unspiked	24	2.9311	0.0273	0.085	2
DAVID	unspiked	48	3.2352	0.0209	0.0421	2
DAVID	unspiked	0	3.2469	-0.016	0.0603	3
DAVID	unspiked	6	3.6616	-0.0329	0.0633	3
DAVID	unspiked	12	3.2965	-0.0205	0.0482	3
DAVID	unspiked	24	3.6167	-0.0426	0.0267	3
DAVID	unspiked	48	4.1564	-0.0292	0.0858	3
FRAME	spiked	0	3.1607	0.0838	37.5918	1
FRAME	spiked	6	3.3755	0.7583	35.5193	1
FRAME	spiked	12	2.9614	1.4231	29.5361	1
FRAME	spiked	24	3.4121	2.3662	31.3406	1
FRAME	spiked	48	3.7868	3.2309	30.7892	1
FRAME	spiked	0	4.9514	-0.1585	48.1015	2
FRAME	spiked	6	4.1207	0.3827	39.06	2
FRAME	spiked	12	3.4374	1.3673	32.6133	2
FRAME	spiked	24	3.0918	1.9523	30.931	2
FRAME	spiked	48	2.8095	2.3232	24.8823	2
FRAME	spiked	0	4.0651	0.0329	45.5133	3
FRAME	spiked	6	3.2103	0.7676	33.5213	3
FRAME	spiked	12	4.3628	2.0293	41.3721	3
FRAME	spiked	24	4.6834	3.0463	35.8544	3
FRAME	spiked	48	4.4602	4.2114	37.2285	3
FRAME	unspiked	0	2.9596	0.0037	-0.0018	1
FRAME	unspiked	6	3.0594	-0.0198	-0.0078	1
FRAME	unspiked	12	3.1524	-0.0092	-0.0194	1
FRAME	unspiked	24	3.0595	0.0015	0.0028	1
FRAME	unspiked	48	2.8413	0.0583	0.0038	1
FRAME	unspiked	0	2.3633	0.0832	0.0603	2
FRAME	unspiked	6	2.9478	-0.0026	0.0397	2
FRAME	unspiked	12	2.6861	0.0065	0.0179	2
FRAME	unspiked	24	2.518	-0.0411	0.0415	2
FRAME	unspiked	48	2.7375	-0.0044	0.0015	2
FRAME	unspiked	0	4.1824	-0.0424	0.18	3
FRAME	unspiked	6	2.2483	0.0048	0.1427	3
FRAME	unspiked	12	3.2094	-0.0887	-0.0196	3
FRAME	unspiked	24	2.4835	0.0036	0.015	3
FRAME	unspiked	48	4.0067	-0.0461	0.0606	3
ICING	spiked	0	1.7281	0.1164	29.549	1
ICING	spiked	6	0.918	0.252	18.51	1
ICING	spiked	12	1.7677	0.7164	34.6833	1
ICING	spiked	24	1.6926	1.5935	23.054	1
ICING	spiked	48	2.6628	4.7764	23.3449	1
ICING	spiked	0	1.9669	0.0486	34.3088	2
ICING	spiked	6	1.1265	0.7351	35.0108	2
ICING	spiked	12	1.4414	0.5996	28.0805	2
ICING	spiked	24	1.5144	1.1606	19.9129	2
ICING	spiked	48	2.0792	3.2812	18.7601	2
ICING	spiked	0	1.2796	0.2181	33.7707	3
ICING	spiked	6	1.0722	0.3047	22.0265	3
ICING	spiked	12	1.1385	0.3652	19.9943	3
ICING	spiked	24	1.4078	1.165	15.4994	3
ICING	spiked	48	2.5621	4.0958	21.7437	3
ICING	unspiked	0	1.044	0.0206	0.1513	1
ICING	unspiked	6	1.5985	0.0449	0.1467	1
ICING	unspiked	12	1.0202	0.0711	0.0565	1
ICING	unspiked	24	1.2471	0.0331	0.0134	1
ICING	unspiked	48	1.4942	0.0153	0.025	1
ICING	unspiked	0	1.1738	0.0215	0.05	2
ICING	unspiked	6	1.0968	-0.0621	0.0932	2
ICING	unspiked	12	1.3244	0.0024	0.0589	2
ICING	unspiked	24	1.6968	-0.0225	0.0933	2
ICING	unspiked	48	2.4183	-0.0096	0.0129	2
ICING	unspiked	0	1.0373	0.0406	0.0407	3
ICING	unspiked	6	1.4396	-0.0012	0.0235	3
ICING	unspiked	12	1.8278	-0.1167	0.0389	3
ICING	unspiked	24	1.2638	-0.0044	0.0606	3
ICING	unspiked	48	1.8857	-0.0122	0.0081	3
MIJA	spiked	0	2.4241	0.6004	26.2111	1
MIJA	spiked	6	3.7661	16.7156	21.6058	1
MIJA	spiked	12	7.3614	31.9358	28.9929	1
MIJA	spiked	24	9.1093	41.4161	28.2201	1
MIJA	spiked	48	11.3625	51.1567	31.7612	1
MIJA	spiked	0	2.4595	0.1636	22.4012	2
MIJA	spiked	6	3.6804	14.9647	18.863	2
MIJA	spiked	12	5.0783	23.0727	20.2601	2
MIJA	spiked	24	8.6316	35.5835	25.0429	2
MIJA	spiked	48	8.9867	37.5633	22.4631	2
MIJA	spiked	0	2.7848	0.5326	22.4871	3
MIJA	spiked	6	5.0272	19.6695	26.7032	3
MIJA	spiked	12	4.6988	21.2899	21.8017	3
MIJA	spiked	24	6.4479	33.5196	25.1788	3
MIJA	spiked	48	9.0375	40.8541	26.3084	3
MIJA	unspiked	0	2.9239	0.0363	0.0623	1
MIJA	unspiked	6	3.7497	0.0144	-0.0109	1
MIJA	unspiked	12	4.5672	0.0135	0.0597	1
MIJA	unspiked	24	4.1546	0.0521	0.0351	1
MIJA	unspiked	48	5.7694	-0.0848	-0.0511	1
MIJA	unspiked	0	2.6286	-0.0273	0.0318	2
MIJA	unspiked	6	2.7548	0.0078	0.1018	2
MIJA	unspiked	12	3.731	0.0515	-0.052	2
MIJA	unspiked	24	4.2665	-0.0381	0.0594	2
MIJA	unspiked	48	5.3865	-0.1136	-0.0484	2
MIJA	unspiked	0	2.5115	0.0029	0.2008	3
MIJA	unspiked	6	3.2396	0.046	0.0192	3
MIJA	unspiked	12	4.0505	-0.0465	0.0124	3
MIJA	unspiked	24	3.6579	0.0464	0.0888	3
MIJA	unspiked	48	4.2318	0.0433	-0.0262	3
NIVEN	spiked	0	3.5885	0.2246	25.1542	1
NIVEN	spiked	6	4.8603	7.5346	26.7158	1
NIVEN	spiked	12	3.6039	7.939	20.2828	1
NIVEN	spiked	24	5.835	12.5153	25.4045	1
NIVEN	spiked	48	4.6537	10.3928	19.3187	1
NIVEN	spiked	0	3.9655	0.3425	28.8028	2
NIVEN	spiked	6	4.5834	6.9696	24.8517	2
NIVEN	spiked	12	5.4898	10.3064	25.7898	2
NIVEN	spiked	24	5.6423	12.1721	24.896	2
NIVEN	spiked	48	6.5468	14.1835	25.8761	2
NIVEN	spiked	0	3.9513	0.3819	27.5101	3
NIVEN	spiked	6	5.9185	10.6158	35.15	3
NIVEN	spiked	12	1.5744	4.2209	23.6122	3
NIVEN	spiked	24	5.7832	11.2863	25.0192	3
NIVEN	spiked	48	5.9074	11.5424	23.25	3
NIVEN	unspiked	0	3.7932	-0.007	0.1391	1
NIVEN	unspiked	6	3.4915	0.0849	0.1845	1
NIVEN	unspiked	12	3.6993	0.0419	0.114	1
NIVEN	unspiked	24	3.6726	0.0616	0.0759	1
NIVEN	unspiked	48	4.4596	-0.1083	0.1215	1
NIVEN	unspiked	0	4.395	-0.0888	-0.0099	2
NIVEN	unspiked	6	3.6497	0.0077	0.0318	2
NIVEN	unspiked	12	4.3181	-0.0577	0.1124	2
NIVEN	unspiked	24	3.5876	-0.0288	0.0896	2
NIVEN	unspiked	48	4.3897	-0.0219	0.1428	2
NIVEN	unspiked	0	3.9414	0.0368	0.0613	3
NIVEN	unspiked	6	4.3156	0.0061	-0.0434	3
NIVEN	unspiked	12	3.6434	0.024	0.0409	3
NIVEN	unspiked	24	4.3027	0.0311	-0.0102	3
NIVEN	unspiked	48	4.2647	-0.074	0.0121	3
PONTOON	spiked	0	1.3991	0.2554	71.2267	1
PONTOON	spiked	6	2.1586	6.6151	66.8093	1
PONTOON	spiked	12	4.1613	21.0512	75.4337	1
PONTOON	spiked	24	8.5135	45.1978	89.0953	1
PONTOON	spiked	48	10.6987	59.7416	88.2486	1
PONTOON	spiked	0	1.035	0.2381	60.489	2
PONTOON	spiked	6	1.6176	5.8006	58.7449	2
PONTOON	spiked	12	2.6014	15.9995	59.9719	2
PONTOON	spiked	24	6.0771	39.0488	66.0579	2
PONTOON	spiked	48	10.1778	62.4369	80.9421	2
PONTOON	spiked	0	0.9812	0.2524	57.3808	3
PONTOON	spiked	6	1.463	6.0122	57.2482	3
PONTOON	spiked	12	3.0013	15.4502	59.2127	3
PONTOON	spiked	24	6.0571	35.9728	64.9689	3
PONTOON	spiked	48	8.2961	49.5837	67.8644	3
PONTOON	unspiked	0	1.4106	0.0324	0.1402	1
PONTOON	unspiked	6	1.067	0.0401	0.067	1
PONTOON	unspiked	12	1.8151	0.0514	0.2563	1
PONTOON	unspiked	24	2.9558	0.1849	0.1572	1
PONTOON	unspiked	48	3.7347	0.1219	-0.0073	1
PONTOON	unspiked	0	1.054	-0.0121	0.002	2
PONTOON	unspiked	6	0.922	0.0091	0.0111	2
PONTOON	unspiked	12	1.332	-0.0101	0.0073	2
PONTOON	unspiked	24	2.2225	0.0066	0.0296	2
PONTOON	unspiked	48	3.2983	0	0.0685	2
PONTOON	unspiked	0	0.9856	0.024	0.0221	3
PONTOON	unspiked	6	0.8834	0.0458	0.0481	3
PONTOON	unspiked	12	1.2476	0.0362	0.0499	3
PONTOON	unspiked	24	2.1918	0.0329	-0.008	3
PONTOON	unspiked	48	3.0503	0.047	0.0185	3
PROSPEROUS	spiked	0	0.0466	0.0848	7.1507	1
PROSPEROUS	spiked	6	0.0618	0.5441	6.5808	1
PROSPEROUS	spiked	12	0.0813	0.5648	5.7481	1
PROSPEROUS	spiked	24	0.0908	0.7518	6.3756	1
PROSPEROUS	spiked	48	0.1014	0.592	4.4301	1
PROSPEROUS	spiked	0	0.0756	0.1196	7.9686	3
PROSPEROUS	spiked	6	0.1051	0.4963	7.1468	3
PROSPEROUS	spiked	12	0.0945	0.5363	6.1774	3
PROSPEROUS	spiked	24	0.0928	0.456	4.8659	3
PROSPEROUS	spiked	48	0.0998	0.6268	4.8092	3
PROSPEROUS	spiked	0	0.0545	0.1004	7.1011	2
PROSPEROUS	spiked	6	0.0702	0.4731	7.0596	2
PROSPEROUS	spiked	12	0.0771	0.48	6.0693	2
PROSPEROUS	spiked	24	0.0771	0.4606	5.1788	2
PROSPEROUS	spiked	48	0.0943	0.6106	4.8886	2
PROSPEROUS	unspiked	0	0.0401	0.0002	0.0014	1
PROSPEROUS	unspiked	6	0.044	0.0008	0.0019	1
PROSPEROUS	unspiked	12	0.0302	0.0038	0.004	1
PROSPEROUS	unspiked	24	0.0446	0.0019	0.0015	1
PROSPEROUS	unspiked	48	0.0628	0.0018	0.0006	1
PROSPEROUS	unspiked	0	0.0428	0.0028	0.0016	3
PROSPEROUS	unspiked	6	0.0592	0.0047	0.006	3
PROSPEROUS	unspiked	12	0.0771	0.0012	0.0112	3
PROSPEROUS	unspiked	24	0.0683	0.0082	0.0069	3
PROSPEROUS	unspiked	48	0.0729	0.0023	0.007	3
PROSPEROUS	unspiked	0	0.0431	0.0002	0.0038	2
PROSPEROUS	unspiked	6	0.0442	0.0003	0.0026	2
PROSPEROUS	unspiked	12	0.0493	0.0018	0.003	2
PROSPEROUS	unspiked	24	0.0475	0.0015	0.0032	2
PROSPEROUS	unspiked	48	0.0605	0.003	0.0018	2
RAT	spiked	0	5.2582	0.17	41.6669	1
RAT	spiked	6	3.8637	4.7261	29.0312	1
RAT	spiked	12	4.5675	5.7036	30.0434	1
RAT	spiked	24	6.4872	8.6846	37.3597	1
RAT	spiked	48	4.4586	7.6845	26.3721	1
RAT	spiked	0	6.5695	0.0997	60.523	2
RAT	spiked	6	7.1661	9.2724	56.2594	2
RAT	spiked	12	8.0702	14.1262	61.2736	2
RAT	spiked	24	4.6981	7.6075	30.4497	2
RAT	spiked	48	3.2624	6.5627	23.6804	2
RAT	spiked	0	4.5756	0.2756	39.2188	3
RAT	spiked	6	3.7065	5.0865	30.4025	3
RAT	spiked	12	4.26	6.6499	33.4971	3
RAT	spiked	24	4.4536	7.3927	30.3953	3
RAT	spiked	48	4.4258	8.6093	29.4742	3
RAT	unspiked	0	3.6728	-0.0518	0.0384	1
RAT	unspiked	6	4.3176	-0.0381	-0.0441	1
RAT	unspiked	12	3.9261	-0.0687	0.0075	1
RAT	unspiked	24	3.8642	0.0127	0.0345	1
RAT	unspiked	48	4.5703	-0.0643	0.0328	1
RAT	unspiked	0	2.6388	0.1785	0.0211	2
RAT	unspiked	6	2.5813	0.1085	0.0542	2
RAT	unspiked	12	2.86	0.0922	0.0186	2
RAT	unspiked	24	2.2307	0.0663	0.1264	2
RAT	unspiked	48	3.5321	0.0273	0.1052	2
RAT	unspiked	0	5.7352	0.052	-0.0501	3
RAT	unspiked	6	3.1188	0.1215	0.0534	3
RAT	unspiked	12	2.6403	0.0254	0.0278	3
RAT	unspiked	24	3.8041	0.0494	-0.0358	3
RAT	unspiked	48	3.3053	0.0994	0.1167	3
YK11	spiked	0	4.9327	0.423	46.2103	1
YK11	spiked	6	6.1717	7.2963	50.5304	1
YK11	spiked	12	6.4266	12.3886	50.1299	1
YK11	spiked	24	8.9711	21.6986	58.1124	1
YK11	spiked	48	7.94	22.5237	47.421	1
YK11	spiked	0	4.8471	0.3245	42.6356	3
YK11	spiked	6	4.7994	5.7522	38.4943	3
YK11	spiked	12	5.6277	9.6656	39.8999	3
YK11	spiked	24	6.1851	14.0522	40.0095	3
YK11	spiked	48	6.2335	14.6154	36.6455	3
YK11	unspiked	0	5.2283	-0.1158	0.0211	1
YK11	unspiked	6	4.8225	0.0486	0.0489	1
YK11	unspiked	12	5.7133	0.0959	0.061	1
YK11	unspiked	24	6.1633	0.0013	0.0487	1
YK11	unspiked	48	6.0097	0.0501	-0.0722	1
YK11	unspiked	0	4.2814	0.0443	0.0796	3
YK11	unspiked	6	4.7917	0.074	0.0555	3
YK11	unspiked	24	5.4353	0.0647	0.0178	3
YK11	unspiked	48	5.5292	0.049	-0.0132	3
YK12	spiked	0	2.7667	0.3312	26.9588	1
YK12	spiked	6	3.9804	13.7481	27.6459	1
YK12	spiked	12	4.5145	19.2916	27.5862	1
YK12	spiked	24	4.3122	19.3767	22.8624	1
YK12	spiked	48	7.2023	29.748	31.479	1
YK12	spiked	0	3.4214	0.281	29.4706	2
YK12	spiked	6	3.8006	13.5479	26.1179	2
YK12	spiked	12	4.664	18.5275	26.8702	2
YK12	spiked	24	3.495	17.0412	20.5957	2
YK12	spiked	48	6.6412	25.2738	26.7119	2
YK12	spiked	0	2.4729	0.2297	24.6107	3
YK12	spiked	6	3.7729	12.4458	24.99	3
YK12	spiked	12	5.3561	19.873	30.4343	3
YK12	spiked	24	4.5093	20.1105	25.3039	3
YK12	unspiked	0	3.2389	-0.018	0.1143	1
YK12	unspiked	6	2.6399	-0.0104	0.0376	1
YK12	unspiked	12	3.7636	-0.0243	0.0069	1
YK12	unspiked	24	3.6442	0.0775	0.0582	1
YK12	unspiked	48	4.2675	0.0124	0.0247	1
YK12	unspiked	0	1.9864	-0.0038	0.0632	2
YK12	unspiked	6	2.9939	-0.0142	-0.0114	2
YK12	unspiked	12	2.7636	0.0336	-0.0106	2
YK12	unspiked	24	2.9696	0.1431	0.0732	2
YK12	unspiked	48	3.0003	0.0471	0.0969	2
YK12	unspiked	0	2.8775	-0.0186	0.0176	3
YK12	unspiked	6	2.6324	0.0336	0.1872	3
YK12	unspiked	12	3.5052	-0.0204	-0.0036	3
YK12	unspiked	24	2.9437	0.0481	0.0281	3
YK12	unspiked	48	4.1604	-0.0335	0.1062	3
YK40	spiked	0	3.204	0.2365	22.2157	1
YK40	spiked	6	3.7231	3.6258	21.6822	1
YK40	spiked	12	4.0477	5.6753	22.0946	1
YK40	spiked	24	6.8306	15.1644	24.6805	1
YK40	spiked	48	9.3918	23.6339	22.7921	1
YK40	spiked	0	3.2394	0.1904	20.9287	2
YK40	spiked	6	3.8976	4.2462	22.6549	2
YK40	spiked	12	4.1027	6.3042	21.9698	2
YK40	spiked	24	5.7298	13.6796	20.4474	2
YK40	spiked	48	11.998	32.5391	27.7116	2
YK40	spiked	0	2.9298	0.1575	18.0706	3
YK40	spiked	6	3.4541	4.0549	19.5744	3
YK40	spiked	12	3.6944	5.877	19.1255	3
YK40	spiked	24	6.5532	15.1603	21.8458	3
YK40	spiked	48	9.8486	23.9122	22.088	3
YK40	unspiked	0	3.109	0.0666	0.0125	1
YK40	unspiked	6	3.7666	0.1014	0.037	1
YK40	unspiked	12	4.7378	0.0864	0.0273	1
YK40	unspiked	24	5.7361	0.1462	0.0261	1
YK40	unspiked	48	6.7543	0.161	0.0484	1
YK40	unspiked	0	3.554	0.0072	-0.008	2
YK40	unspiked	6	4.5135	0.0664	0.0038	2
YK40	unspiked	12	5.2069	0.0353	0.0037	2
YK40	unspiked	24	7.701	0	0.0073	2
YK40	unspiked	48	8.0123	0.101	-0.0032	2
YK40	unspiked	0	2.9203	-0.0162	0.011	3
YK40	unspiked	6	3.7178	-0.0252	0.0217	3
YK40	unspiked	12	4.8951	-0.0173	-0.0198	3
YK40	unspiked	24	6.5523	-0.0009	0.0115	3
YK40	unspiked	48	3.5183	-0.0026	0.0007	3
YK42	spiked	0	4.6124	0.1541	49.8057	1
YK42	spiked	6	3.3762	0.6408	35.8401	1
YK42	spiked	12	3.9876	2.4473	36.6572	1
YK42	spiked	24	5.7351	8.4705	39.8258	1
YK42	spiked	48	6.9967	14.3556	43.0504	1
YK42	spiked	0	3.3321	0.0903	34.7171	3
YK42	spiked	6	3.0707	0.7435	37.1564	3
YK42	spiked	12	3.7708	2.6407	37.4647	3
YK42	spiked	24	4.3388	8.4551	36.2967	3
YK42	spiked	48	5.6081	13.2693	35.4214	3
YK42	unspiked	0	3.8505	0.1614	0.192	1
YK42	unspiked	6	3.7797	0.0261	0.1351	1
YK42	unspiked	12	3.8338	-0.0218	0.0732	1
YK42	unspiked	24	4.1846	-0.0784	0.1023	1
YK42	unspiked	48	4.8135	0.0923	0.0791	1
YK42	unspiked	0	3.0378	0.0618	0.0687	3
YK42	unspiked	6	3.2844	-0.0147	0.0102	3
YK42	unspiked	12	3.1142	-0.0144	0.0095	3
YK42	unspiked	24	3.6467	0.0165	-0.0102	3
YK42	unspiked	48	3.961	0.0558	0.0618	3
YK60	spiked	0	2.6739	0.0905	58.2153	1
YK60	spiked	6	1.5967	0.2245	34.8845	1
YK60	spiked	12	1.4826	0.5001	41.8514	1
YK60	spiked	24	1.8292	1.4766	41.9177	1
YK60	spiked	48	2.5699	5.9113	40.2931	1
YK60	spiked	0	0.9184	0.098	39.8202	3
YK60	spiked	6	0.8001	0.2187	35.8663	3
YK60	spiked	12	0.7604	0.4281	32.3202	3
YK60	spiked	24	0.8542	1.1399	34.2039	3
YK60	spiked	48	2.2213	7.151	34.6173	3
YK60	spiked	0	1.1322	0.1354	45.477	2
YK60	spiked	6	1.0692	0.1107	40.6327	2
YK60	spiked	12	0.9151	0.3064	40.7434	2
YK60	spiked	24	2.0073	3.1928	71.0382	2
YK60	spiked	48	2.6496	9.0367	41.8349	2
YK60	unspiked	0	1.8658	-0.1182	-0.0156	1
YK60	unspiked	6	0.8709	0.0261	0.0287	1
YK60	unspiked	12	1.019	-0.0036	0.0307	1
YK60	unspiked	24	1.8531	0.0385	0.1216	1
YK60	unspiked	48	3.9755	-0.0097	0.1777	1
YK60	unspiked	0	0.6421	0.042	0.0404	3
YK60	unspiked	6	0.7618	0.0455	0.0303	3
YK60	unspiked	12	0.7378	0.0232	0.0434	3
YK60	unspiked	24	1.1903	0.0403	0.0331	3
YK60	unspiked	48	3.3912	0.0477	0.0389	3
YK60	unspiked	0	0.809	0.0037	0.033	2
YK60	unspiked	6	0.9292	-0.0056	0.0445	2
YK60	unspiked	12	0.8732	-0.0069	0.0239	2
YK60	unspiked	24	1.2757	0.0281	0.0267	2
YK60	unspiked	48	3.0423	-0.0668	0.0006	2
YK67	spiked	0	1.6942	-0.0128	13.9125	1
YK67	spiked	6	1.6593	2.1081	10.4774	1
YK67	spiked	12	8.053	12.1629	26.7269	1
YK67	spiked	24	9.3289	9.1212	10.6863	1
YK67	spiked	48	8.2833	9.6596	9.4892	1
YK67	spiked	0	0.8089	-0.0221	12.1005	2
YK67	spiked	6	0.9035	2.9033	13.3103	2
YK67	spiked	12	1.6923	3.8253	10.9631	2
YK67	spiked	24	1.4708	9.4618	13.566	2
YK67	spiked	48	4.297	15.9426	12.7826	2
YK67	unspiked	0	2.6881	-0.0173	0.5645	1
YK67	unspiked	6	0.9416	-0.0352	0.1203	1
YK67	unspiked	12	19.3781	-1.6544	0.8737	1
YK67	unspiked	24	2.479	-0.0505	0.4026	1
YK67	unspiked	48	2.4571	0.3261	0.009	1
YK67	unspiked	0	1.2181	-0.027	0.1461	2
YK67	unspiked	6	0.5168	0.0618	0.0936	2
YK67	unspiked	12	0.8183	-0.0067	-0.0168	2
YK67	unspiked	24	1.3553	0.0216	-0.0267	2
YK67	unspiked	48	-5.1033	0.0431	-1.1823	2
YKE1	spiked	0	1.8411	0.1626	46.0778	1
YKE1	spiked	6	2.4147	3.881	48.5595	1
YKE1	spiked	12	2.877	6.9596	48.4298	1
YKE1	spiked	24	3.4991	11.7959	49.866	1
YKE1	spiked	48	4.3495	16.9107	46.9775	1
YKE1	spiked	0	2.0354	0.2213	53.9666	2
YKE1	spiked	6	2.493	3.6751	51.111	2
YKE1	spiked	12	3.0758	7.1659	53.5686	2
YKE1	spiked	24	3.2441	10.3463	48.6321	2
YKE1	spiked	48	4.4413	16.0816	49.6416	2
YKE1	spiked	0	2.2564	0.1744	52.2237	3
YKE1	spiked	6	2.6157	4.2137	52.5618	3
YKE1	spiked	12	2.973	7.344	52.8008	3
YKE1	spiked	24	3.7898	11.8965	52.47	3
YKE1	spiked	48	5.5592	18.9703	56.7218	3
YKE1	unspiked	0	1.6746	0.0135	0.0525	1
YKE1	unspiked	6	1.803	0.027	0.0319	1
YKE1	unspiked	12	1.984	-0.0269	0.0273	1
YKE1	unspiked	24	2.3646	0.0295	0.0219	1
YKE1	unspiked	48	2.8392	-0.0039	0.0052	1
YKE1	unspiked	0	2.0528	0.0153	0.0921	2
YKE1	unspiked	12	2.5395	0.0201	0.0073	2
YKE1	unspiked	24	2.5265	0.0143	0.0132	2
YKE1	unspiked	48	3.1228	0.0071	0.0101	2
YKE1	unspiked	0	1.8316	0.001	0.0364	3
YKE1	unspiked	6	1.9313	-0.0088	0.0139	3
YKE1	unspiked	12	2.1636	-0.026	-0.012	3
YKE1	unspiked	24	2.4781	-0.0089	0.0087	3
YKE1	unspiked	48	2.8227	0.0051	-0.0121	3
YKN1	spiked	0	0.5767	0.0659	24.0855	1
YKN1	spiked	6	0.7296	3.426	30.9133	1
YKN1	spiked	12	0.4138	4.0326	26.5204	1
YKN1	spiked	24	0.7541	5.1315	27.2149	1
YKN1	spiked	48	1.3169	8.8639	30.2255	1
YKN1	spiked	0	0.5089	0.1107	25.8925	2
YKN1	spiked	6	0.5916	2.1812	22.9708	2
YKN1	spiked	12	1.2169	3.8366	24.7338	2
YKN1	spiked	24	0.7199	4.4864	25.1268	2
YKN1	spiked	48	0.8781	5.7654	25.8501	2
YKN1	spiked	0	0.4899	0.1194	28.7992	3
YKN1	spiked	6	0.7205	2.7937	24.4144	3
YKN1	spiked	12	0.8311	3.9354	24.0271	3
YKN1	spiked	24	0.642	4.186	21.3991	3
YKN1	spiked	48	0.8946	6.6066	23.3811	3
YKN1	unspiked	0	0.5544	-0.0331	-0.0036	1
YKN1	unspiked	6	0.3635	0.0399	-0.004	1
YKN1	unspiked	12	0.5961	-0.073	0.0525	1
YKN1	unspiked	48	0.7449	-0.0071	-0.0035	1
YKN1	unspiked	0	0.7048	0.0252	-0.0435	2
YKN1	unspiked	6	0.8167	-0.0657	0.037	2
YKN1	unspiked	12	0.4611	0.0314	0.0215	2
YKN1	unspiked	24	0.472	0.0048	-0.0101	2
YKN1	unspiked	48	0.7571	-0.0091	-0.0149	2
YKN1	unspiked	0	0.9762	-0.0216	0.0111	3
YKN1	unspiked	6	0.7204	-0.0157	-0.0334	3
YKN1	unspiked	12	0.4915	0.0231	0.0699	3
YKN1	unspiked	24	0.7084	-0.0062	0.0514	3
YKN1	unspiked	48	0.6459	-0.0241	0.0669	3
YKS1	spiked	0	3.2224	0.2778	70.758	1
YKS1	spiked	6	2.8877	2.2358	64.1997	1
YKS1	spiked	12	3.5397	5.3253	69.4191	1
YKS1	spiked	24	7.1137	24.8583	75.0636	1
YKS1	spiked	48	12.1984	51.5408	81.3442	1
YKS1	spiked	0	2.324	0.2889	59.6433	2
YKS1	spiked	6	2.0966	2.076	52.5929	2
YKS1	spiked	12	2.897	4.5957	60.5769	2
YKS1	spiked	24	5.6162	21.5781	66.4408	2
YKS1	spiked	48	10.5625	41.2799	64.492	2
YKS1	spiked	0	2.6339	0.4669	65.032	3
YKS1	spiked	6	2.6366	2.5139	58.805	3
YKS1	spiked	12	2.4203	4.2075	52.3155	3
YKS1	spiked	24	4.5775	17.4901	52.9099	3
YKS1	spiked	48	11.4425	46.1699	72.1254	3
YKS1	unspiked	0	2.8087	0.0473	0.1409	1
YKS1	unspiked	6	2.4628	0.0475	0.1755	1
YKS1	unspiked	12	3.5778	0.0987	0.0827	1
YKS1	unspiked	24	5.8957	0.0081	0.0369	1
YKS1	unspiked	48	9.7745	-0.098	-0.0734	1
YKS1	unspiked	0	1.899	0.0057	0.1009	2
YKS1	unspiked	6	2.1843	0.0158	0.0284	2
YKS1	unspiked	12	2.4021	0.0197	0.0904	2
YKS1	unspiked	24	3.6911	-0.0178	0.0593	2
YKS1	unspiked	48	6.6122	-0.1422	-0.07	2
YKS1	unspiked	0	1.791	0.0838	0.105	3
YKS1	unspiked	6	1.9982	0.0422	0.0282	3
YKS1	unspiked	12	2.2769	0.0232	0.0231	3
YKS1	unspiked	24	3.9698	0.0134	0.0326	3
YKS1	unspiked	48	6.0301	0.1183	0.045	3
YKS2	spiked	0	0.6625	0.1045	27.6326	1
YKS2	spiked	6	0.8037	1.818	23.222	1
YKS2	spiked	12	1.0477	2.6681	19.9464	1
YKS2	spiked	24	2.4968	7.4829	23.2884	1
YKS2	spiked	48	4.7883	13.0213	20.2299	1
YKS2	spiked	0	0.6718	0.0958	25.6818	2
YKS2	spiked	6	1.2007	3.8384	44.3477	2
YKS2	spiked	12	1.1876	3.2687	23.8223	2
YKS2	spiked	24	2.3698	6.599	20.8739	2
YKS2	spiked	48	5.6405	15.1632	23.0219	2
YKS2	spiked	0	0.816	0.0929	26.0497	3
YKS2	spiked	6	0.9918	1.7451	22.4493	3
YKS2	spiked	12	1.3018	3.2464	24.4372	3
YKS2	spiked	24	2.5271	7.3762	24.4392	3
YKS2	spiked	48	5.7819	16.0051	25.1547	3
YKS2	unspiked	0	0.596	0.0288	0.0238	1
YKS2	unspiked	6	1.3571	-0.0033	-0.0029	1
YKS2	unspiked	12	2.1187	-0.0041	0.0038	1
YKS2	unspiked	24	3.4543	0.0394	0.0209	1
YKS2	unspiked	48	4.8373	0.0243	0.003	1
YKS2	unspiked	0	0.6557	0.011	0.0242	2
YKS2	unspiked	6	1.4544	-0.0031	0.0056	2
YKS2	unspiked	12	2.2987	0.0028	-0.0017	2
YKS2	unspiked	24	3.8694	-0.0082	-0.0065	2
YKS2	unspiked	48	4.9506	0.0085	-0.006	2
YKS2	unspiked	0	0.6042	0.0028	0.0453	3
YKS2	unspiked	6	1.1755	0.0038	0.0223	3
YKS2	unspiked	12	2.3044	-0.0306	-0.008	3
YKS2	unspiked	24	3.4584	-0.0014	0.0086	3
YKS2	unspiked	48	5.5105	-0.0402	-0.0486	3
YKW1	spiked	0	0.8688	0.2445	23.8057	1
YKW1	spiked	6	1.3066	5.9134	26.3821	1
YKW1	spiked	12	1.7592	10.3484	24.3648	1
YKW1	spiked	24	2.7399	16.8634	26.2689	1
YKW1	spiked	48	4.743	29.0851	29.2181	1
YKW1	spiked	0	0.803	0.2689	24.3404	2
YKW1	spiked	6	1.5814	8.2277	29.6984	2
YKW1	spiked	12	1.5386	8.1234	23.4984	2
YKW1	spiked	24	2.1508	12.3168	22.294	2
YKW1	spiked	48	3.6672	21.9047	24.1688	2
YKW1	spiked	0	0.7532	0.2962	25.3152	3
YKW1	spiked	6	1.7758	9.2399	30.2399	3
YKW1	spiked	12	1.5409	8.4313	23.1943	3
YKW1	spiked	24	2.4282	14.4233	24.6546	3
YKW1	spiked	48	4.131	24.0865	26.3741	3
YKW1	unspiked	0	0.7477	-0.0057	0.016	1
YKW1	unspiked	6	1.0423	0.0039	0.0181	1
YKW1	unspiked	12	1.0303	-0.0008	0.0081	1
YKW1	unspiked	24	1.4505	-0.0144	0.0077	1
YKW1	unspiked	48	1.8113	-0.0285	-0.0023	1
YKW1	unspiked	0	0.7351	0.0225	0.0092	2
YKW1	unspiked	6	0.9451	0.0202	0.0247	2
YKW1	unspiked	12	1.0652	0.0091	0.0195	2
YKW1	unspiked	24	1.2564	0.0138	0.017	2
YKW1	unspiked	48	1.6297	0.0269	0.0132	2
YKW1	unspiked	0	0.6862	0.0139	0.0199	3
YKW1	unspiked	6	0.8866	0.0198	0.0059	3
YKW1	unspiked	12	1.0065	0.0257	0.0073	3
YKW1	unspiked	24	1.6259	0.0169	0.0148	3
YKW1	unspiked	48	1.956	0.0222	0.0079	3
